# Supplementary material for: In situ vaccination with cowpea mosaic virus elicits systemic antitumor immunity and potentiates immune checkpoint blockade
Source: PubMed Central journal article supplement — J Immunother Cancer. 2022 Dec 2;10(12):e005834. doi: 10.1136/jitc-2022-005834 (PMC9723958; doi:10.1136/jitc-2022-005834), 2022-12-02
Supplement: jitc-2022-005834supp004.pdf [file jitc-2022-005834supp004.pdf]

## ***In situ* vaccination with cowpea mosaic virus elicits systemic anti-tumor immunity and potentiates immune checkpoint blockade**

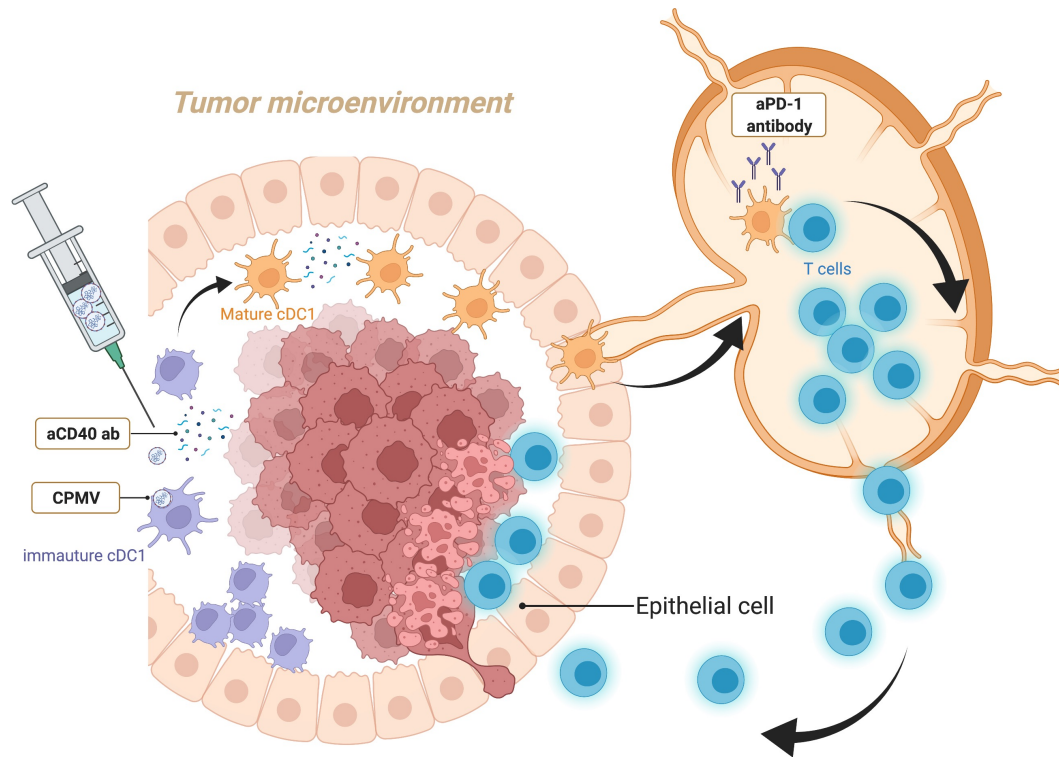

### **Authors**

Chenkai Mao, Veronique Beiss, Gregory Ho, Jennifer Fields, Nicole F. Steinmetz, Steven Fiering

### **Correspondence**

[fiering@dartmouth.edu](mailto:fiering@dartmouth.edu)

[nsteinmetz@ucsd.edu](mailto:nsteinmetz@ucsd.edu)

### **In Brief**

Cowpea mosaic virus (CPMV) stimulates cross-presentation between conventional dendritic cell 1 (cDC1) and CD8<sup>+</sup> T cells to elicit potent systemic anti-tumor immunity. By further activating cDCs and T cells with agonistic CD40 antibody (aCD40 ab) and anti-PD1, we designed a powerful combinations to combat immune cold tumors.
