# Supplementary figures and images for: In situ vaccination with cowpea mosaic virus elicits systemic antitumor immunity and potentiates immune checkpoint blockade
Source: PubMed Central journal article supplement — J Immunother Cancer. 2022 Dec 2;10(12):e005834. doi: 10.1136/jitc-2022-005834 (PMC9723958; doi:10.1136/jitc-2022-005834), 2022-12-02

## S.F. 1. CPMV characterization

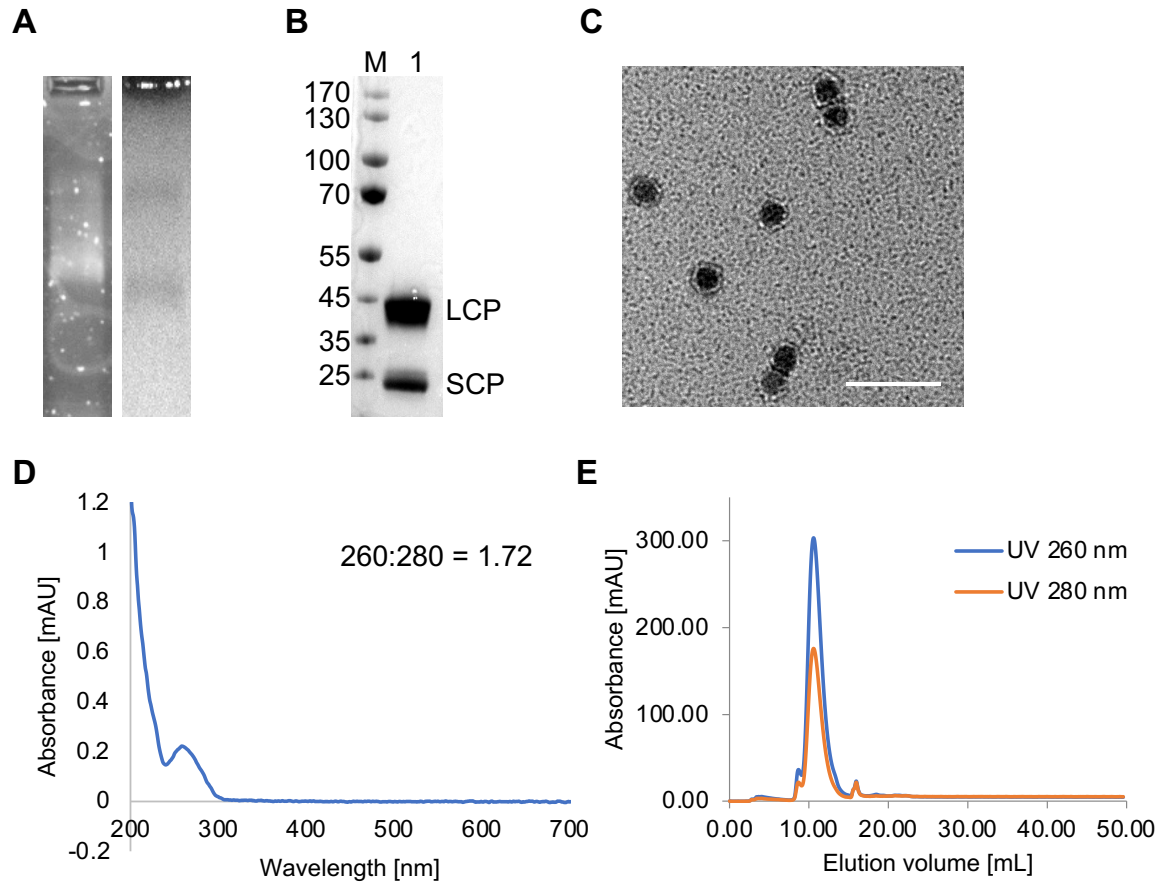

Supplement: jitc-2022-005834supp001.pdf [file jitc-2022-005834supp001.pdf]

**S.F. 2.** Localized vitiligo was observed in mouse with effective treatment at the tumor site.

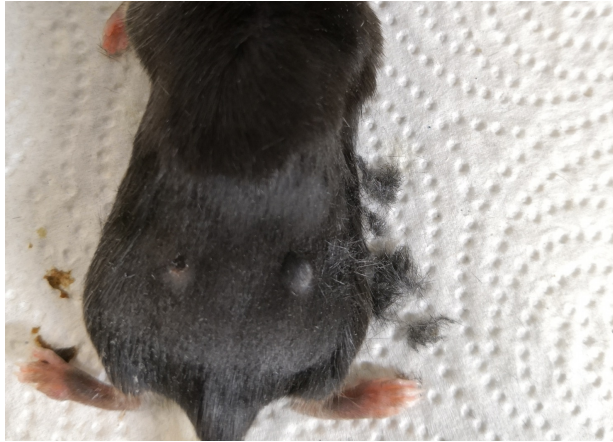

Supplement: jitc-2022-005834supp002.pdf [file jitc-2022-005834supp002.pdf]

### **S.F. 3.** Rejection of rechallenge of B16F10 in cured mice.

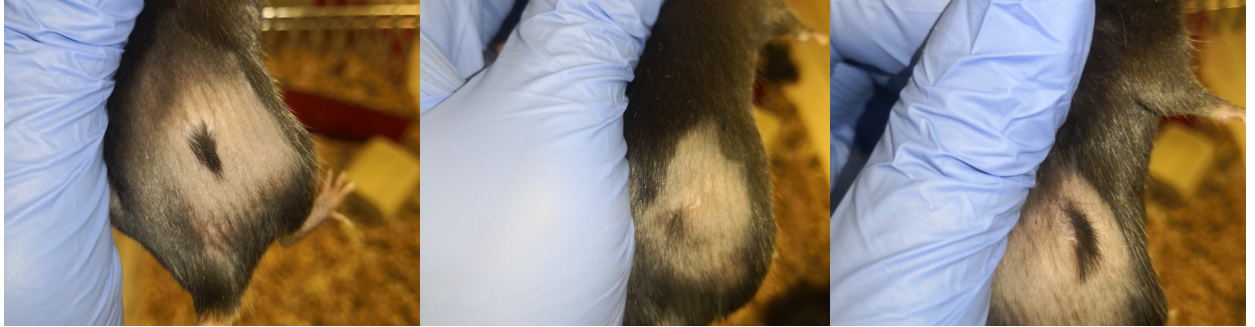

Supplement: jitc-2022-005834supp003.pdf [file jitc-2022-005834supp003.pdf]
